# Supplementary material
Source: publisher figshare collection journal article supplement (https://springernature.figshare.com/ndownloader/files/22076361)
Supplement: Supplementary file 1 [file 22076361]

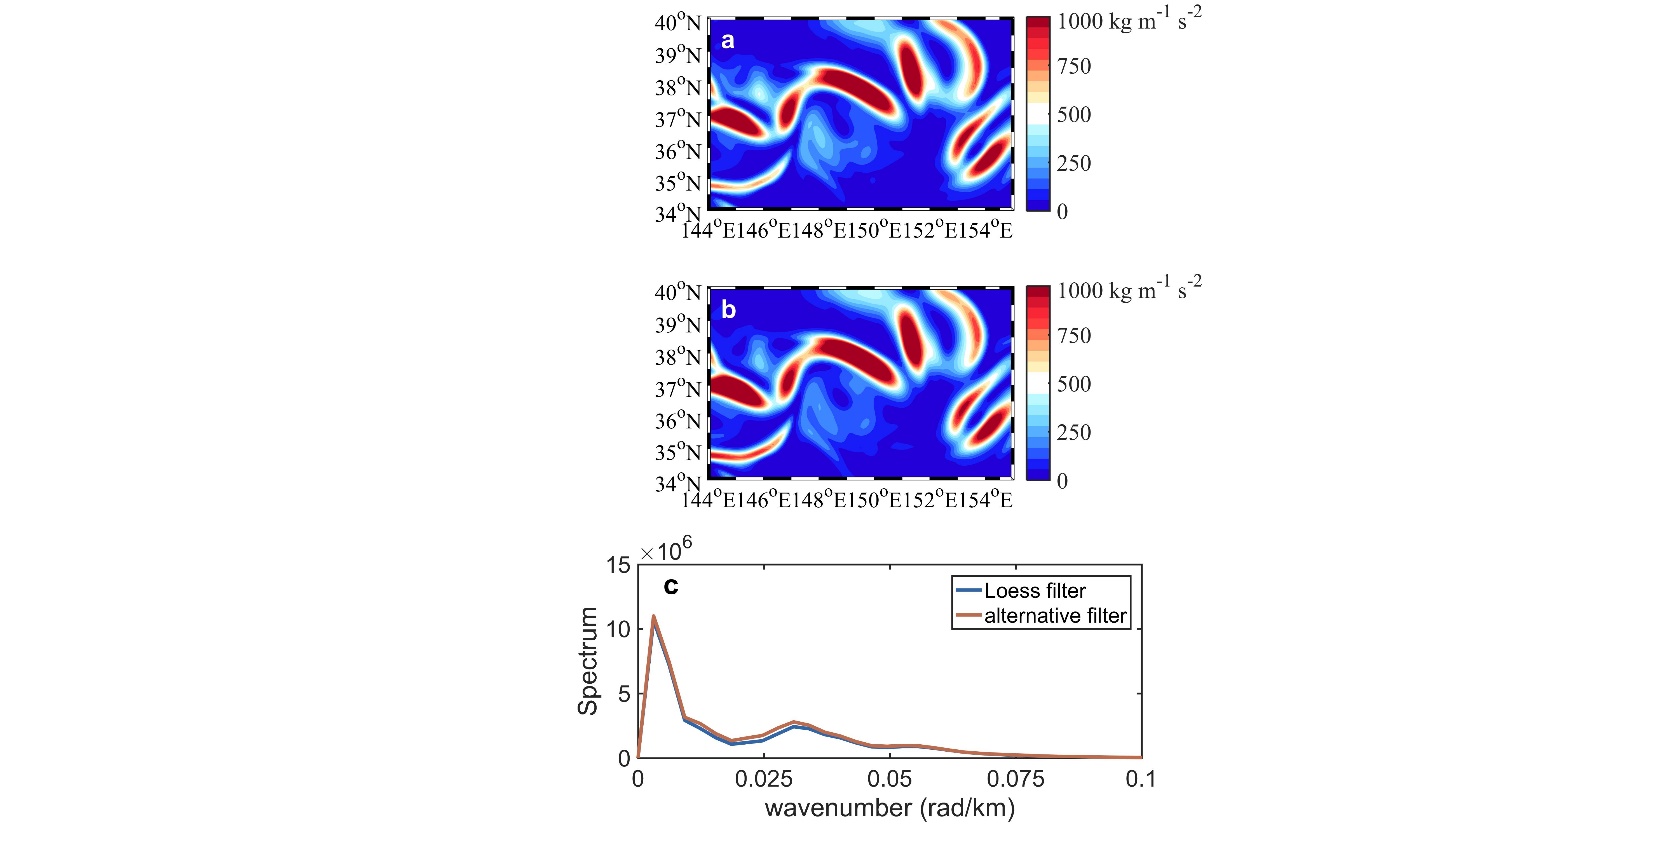


**Figure S1.** The isolation of mesoscale variabilities. (a) A snapshot of EKE isolated by a Loess filter with a 15° (longitude) × 5° (latitude) half width in the Kuroshio extension region (34°-40°N, 144°-155°E); (b) is similar to (a) but for the alternative filter we use in the paper. (c) The wavenumber spectrum of (a) and (b) denoted by the blue and red lines respectively.
